# Supplementary material
Source: PubMed Central journal article supplement (PMC6171816)
Supplement: jciinsight-3-121225-s050.pdf [file jciinsight-3-121225-s050.pdf]

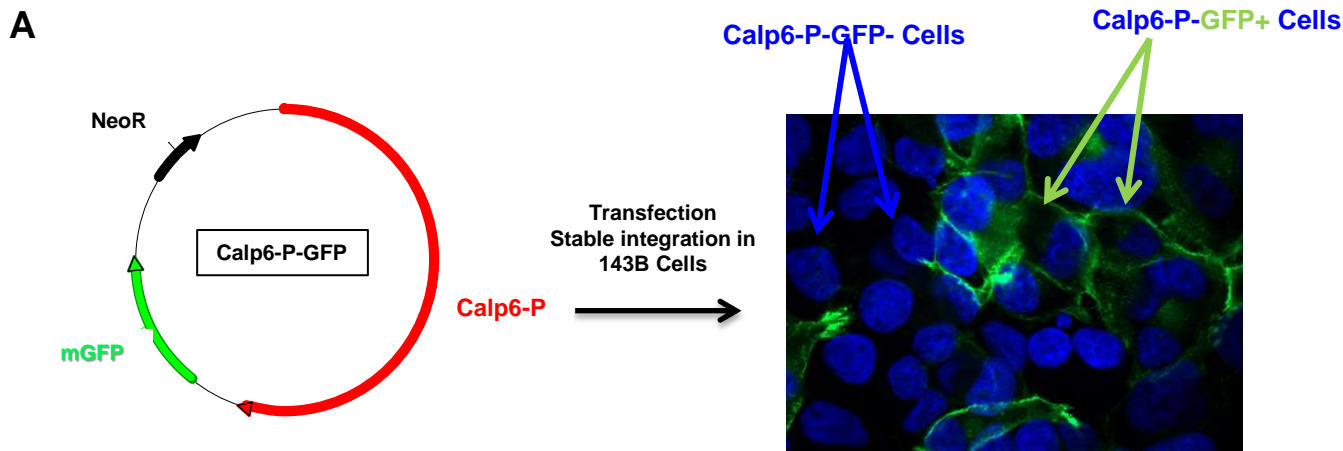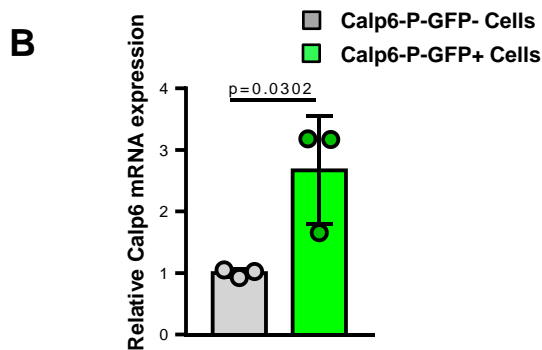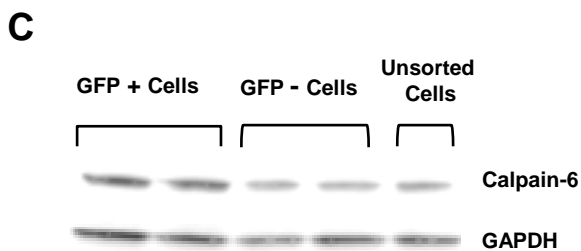

**Supplementary Figure 2: Calpain-6 and GFP expression are associated in human Calp6-P-GFP cells.** (A) Diagrammatic representation of the Calp6-P-GFP transgene. The reporter construct consisted in a sequence coding membrane GFP controlled by the calpain-6 regulatory sequence (Calp6-P). Sarcoma cells were transfected with this construction and selected with neomycin for stable integration. GFP expression was monitored by fluorescence microscopy. Calp6-P-GFP 143B cells were sorted according to GFP expression by flow cytometry in ImagoSeine platform (Paris Diderot University, Paris, France). (B) RT-PCR analysis of calpain-6 mRNA expression in sorted Calp6-P-GFP- and GFP+ 143B cells. Data are mean  $\pm$  SD from 3 independent RNA extracts evaluated by one way ANOVA. (C) Western blot analysis of calpain-6 protein level with protein extracts from Calp6-P-GFP+, GFP- and unsorted cells. GAPDH was a loading control.

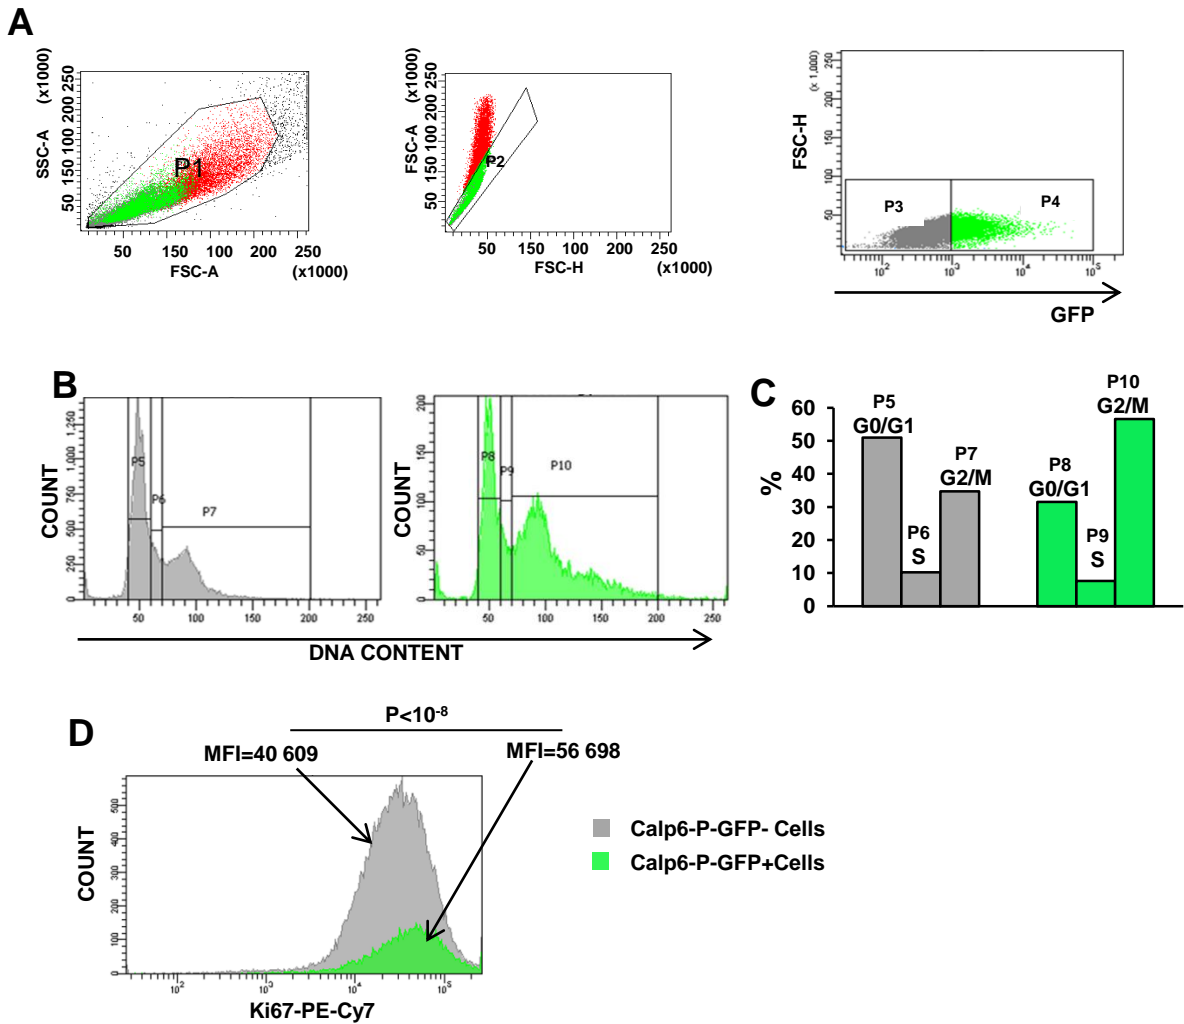

**Supplementary Figure 3: Switch in G2/M at the expense of G0/G1 and increased proliferation for calpain-6-expressing human TC71 Ewing cells.** (A-C) Flow cytometry of DNA content in Calp6-P-GFP- and GFP+ cells. (A) Gating strategy to select Calp6-P-GFP- and GFP+ cells. Starting number of cells was 50 000. The selected cells in P2 were analyzed for GFP expression. P3 and P4 contained 32 278 GFP- and 7684 GFP+ cells, respectively. (B) Dye Cycle Violet fluorescence was measured for GFP- and GFP+ cells. Cell cycle phases were determined according to DNA content. (C) The proportion of cells in each phase. (D) Calp6-P-GFP TC71 cells were labeled with a PeCy7-conjugated anti-Ki67 antibody. Mean fluorescence intensity (MFI) of Ki67 labeling for GFP- or GFP+ TC71 cells. N=50 000 cells. Means were compared by two-sided Student *t* test.

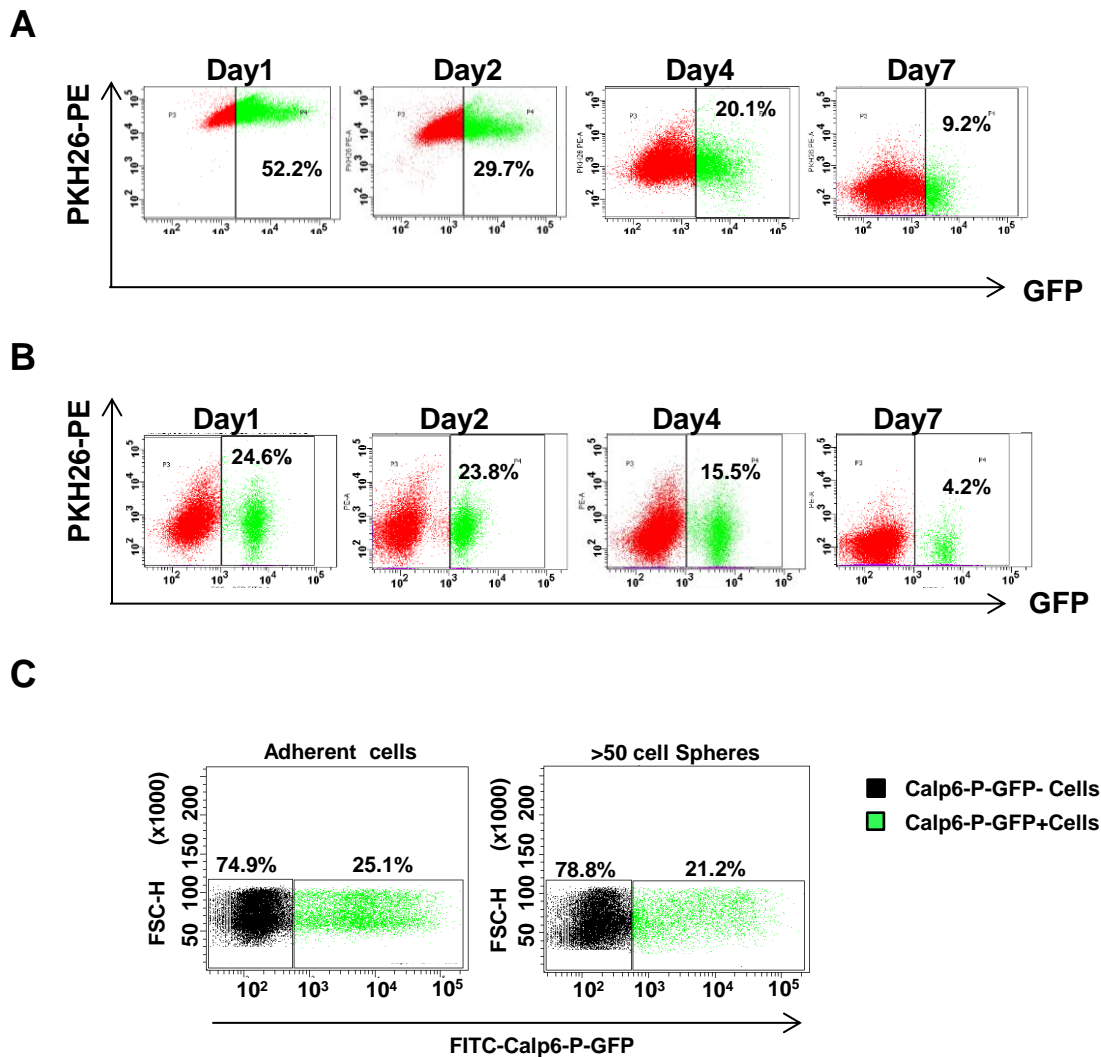

**Supplementary Figure 4: Calp6-P-GFP+ cell population decreases during cell growth.** (A,B) Flow cytometry of cell divisions. 143B cells (A) or K7M2 cells (B) were seeded at low density and labeled with PE-conjugated PKH26. Fluorescence of this membrane marker and GFP expression are reported at day 1, 2, 4 and 7. (C) Flow cytometry of the proportion of Calp6-P-GFP+ cells in adherent confluent culture and in large spheres comprising more than 50 cells. 50 000 cells were used as a starting cell population.

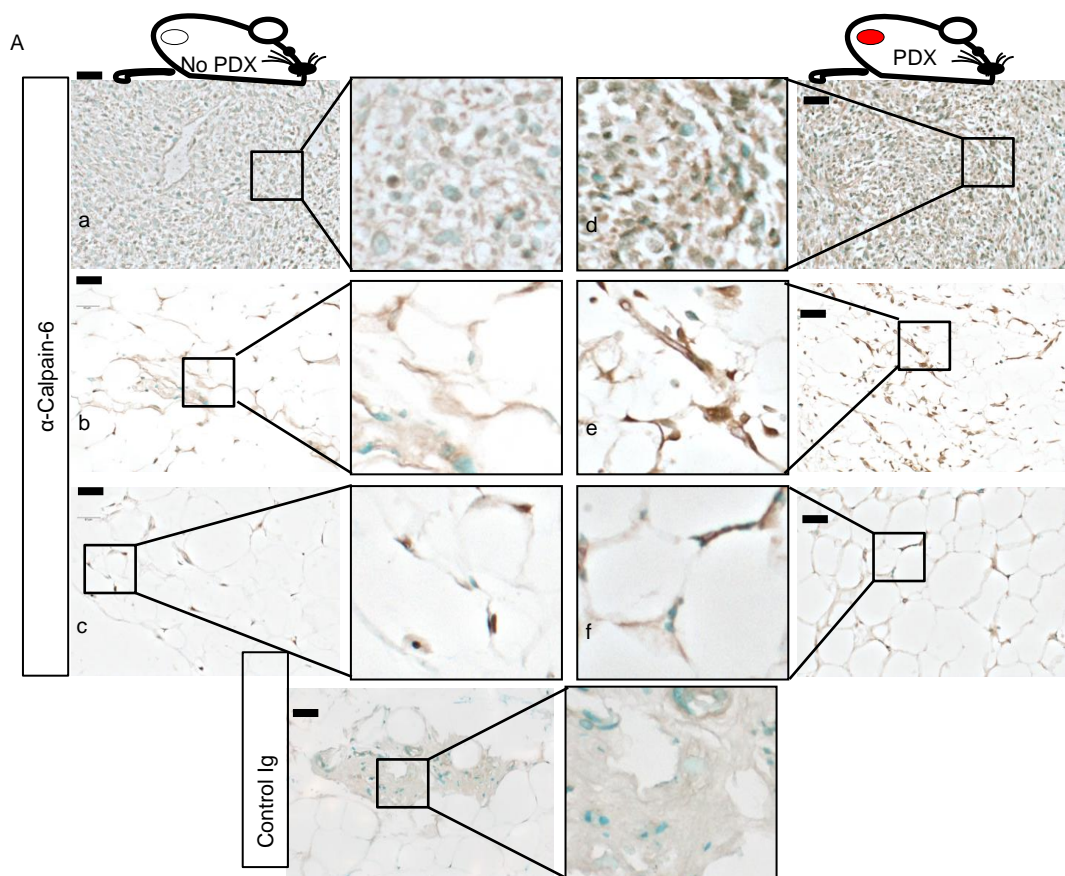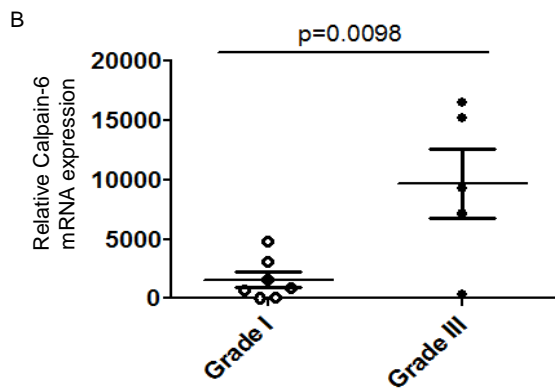

**Supplementary Figure 5: Calpain-6 expression is associated with liposarcomas engraftment in mice and the highest grade. (A)** Immunohistochemistry of calpain-6 in patient liposarcomas not engrafted (a, b, c) or successfully engrafted (d, e, f) in mice. Controls were rabbit Ig. **(B)** RT-PCR analysis of calpain-6 mRNA expression in patient samples of liposarcomas from grade I and III. Horizontal lines are mean; whiskers are SD..

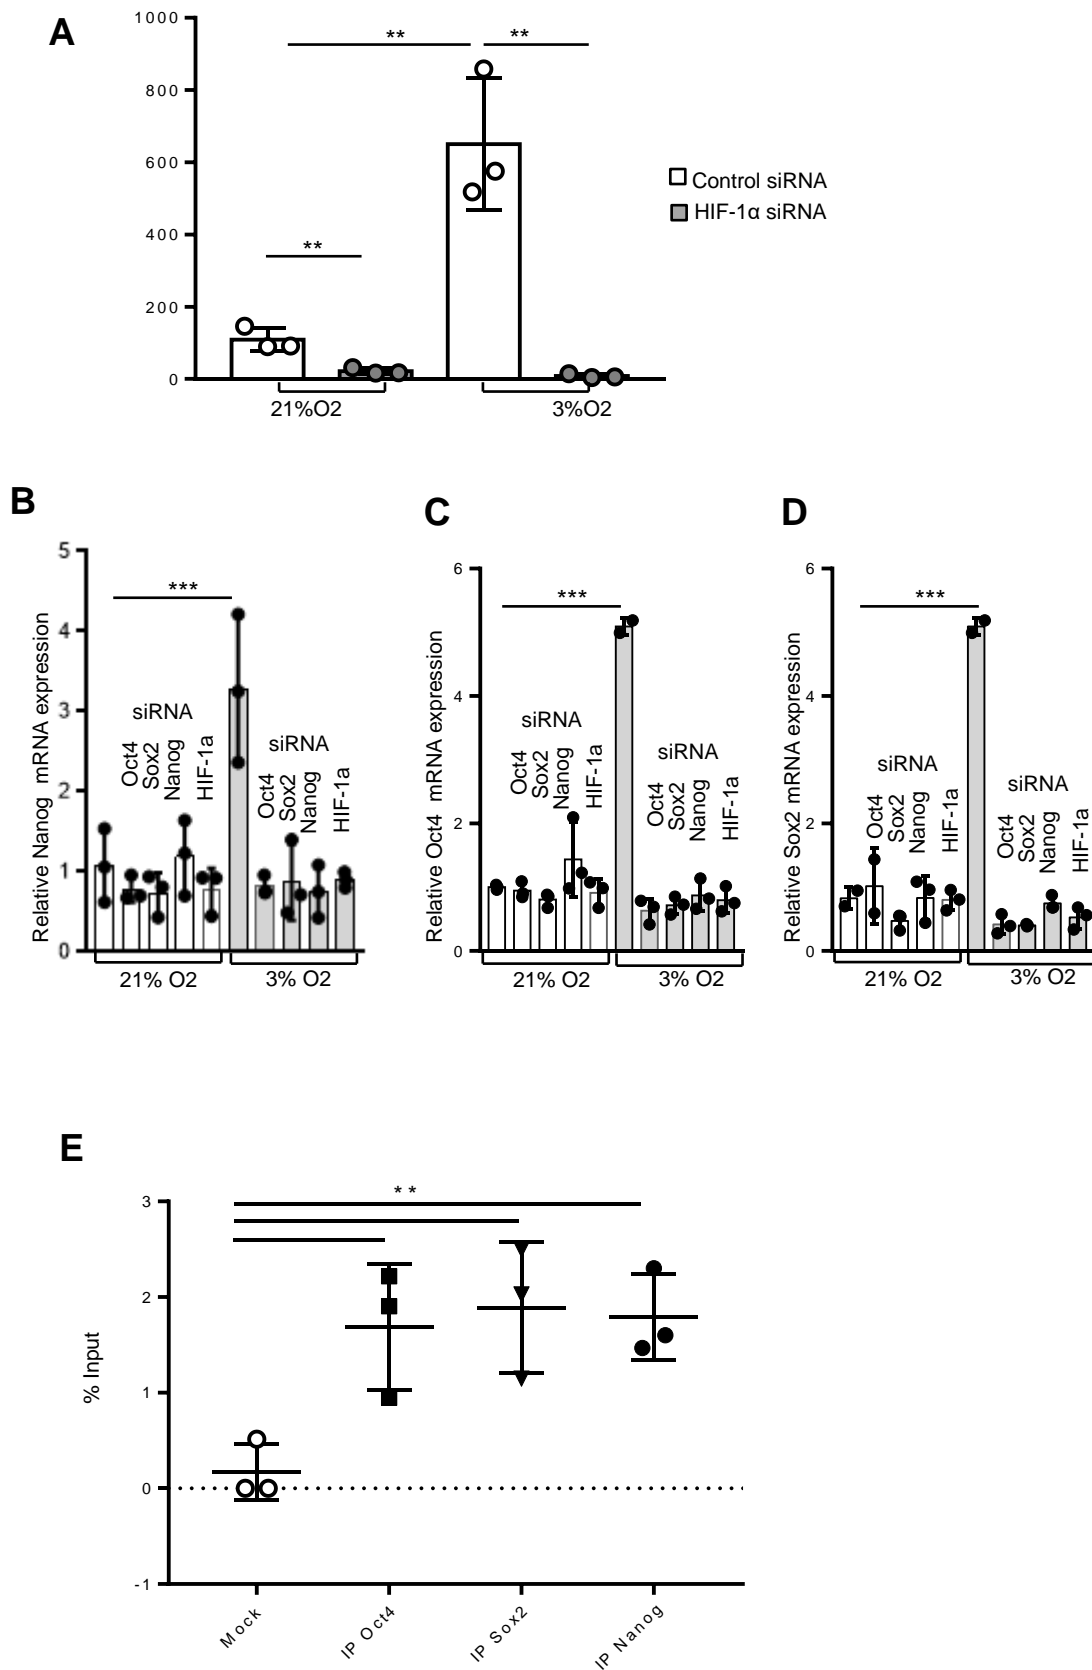

**Supplementary Figure 6: Increased Oct4 and Nanog expression in hypoxia depends on the stem-cell pathway involving Oct4, Nanog and Sox2.** (A) Sarcoma cells were seeded in 24-well plates and transfected with a control or HIF responsive elements containing plasmid (HRE) with control or HIF-1α siRNA. Luciferase served as reporter gene. The cells were cultured for 24H in 21% or 3% O<sub>2</sub>. phRL-SV40, a renilla expression plasmid that served as internal control. Renilla and luciferase activity was measured by using chemoluminescent substrates. Data are mean ± SD from 4 wells evaluated by one way ANOVA, RLU= relative light units. (B-D) RT-PCR analysis of siRNA inhibition of Oct4, Sox2, Nanog or HIF-1α on the hypoxia-dependent induction of Nanog (B) and Oct4 (C) and Sox2 (D). Data are mean ± SD in 3 independent wells evaluated by one way ANOVA. \*\*\* indicate p < 0,001. (E) ChIP of genomic DNA from 143B cells with control Ig (Mock), anti-Oct-4 (IP Oct4), anti-Sox2 (IP Sox2) or anti-Nanog (IP Nanog) antibodies. Cells were cultured in 3% O<sub>2</sub>. Immunoprecipitated chromatin was analysed by qPCR. Data are mean ± SD from 3 different replications. \*\* indicate p < 0,01

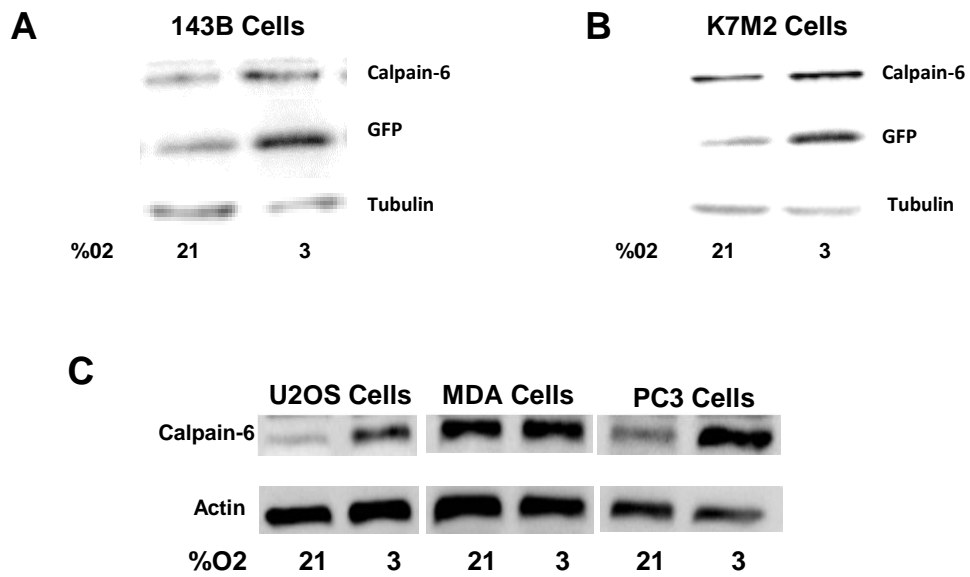

**Supplementary Figure 7: Hypoxia increases Calp6-P transactivation activity and calpain-6 expression.** (A-B) Western blot analysis of calpain-6 and GFP protein levels from Calp6-P-GFP 143B (A) and K7M2 (B) cells. Cells were cultured for 24 hr with 21% or 3% O<sub>2</sub>. Tubulin was a loading control. (C) Western blot analysis of calpain-6 protein level in cell lines cultured with 21% and 3% O<sub>2</sub>. Actin was a loading control.

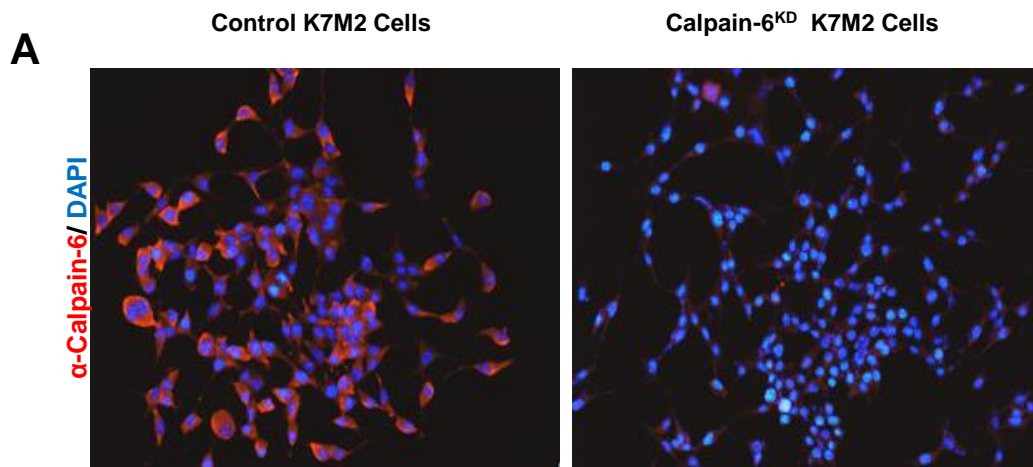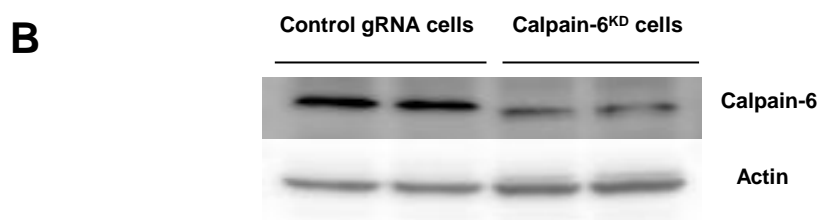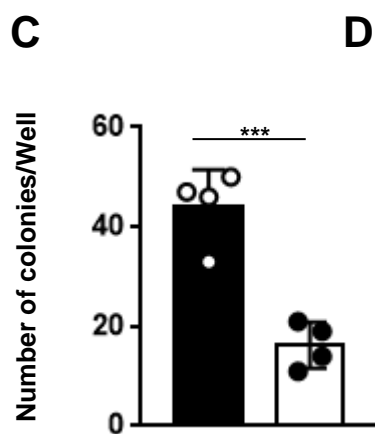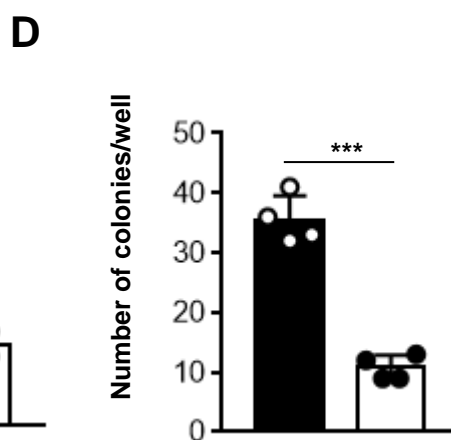

**Supplementary Figure 8: Calpain-6 knockdown reduces stem cell colony formation.** (A) Immunofluorescence of calpain-6 (red) in control and calpain-6 knockdown (calpain-6<sup>KD</sup>) by RNA-guided CRISPR-Cas9 in K7M2 cells. (B) Western blot analysis of calpain-6 protein level in control and calpain-6<sup>KD</sup> 143B cells. Actin was a loading control. (C-D) Control or calpain-6<sup>KD</sup> human 143B (C) or TC71 (D) cells were seeded on non-adherent plastic coated with a growth factor-free matrix for cell attachment and cultured in serum-free stem cell medium. Data are mean  $\pm$  SD of 4 independent wells evaluated by two-sided Student *t* test.



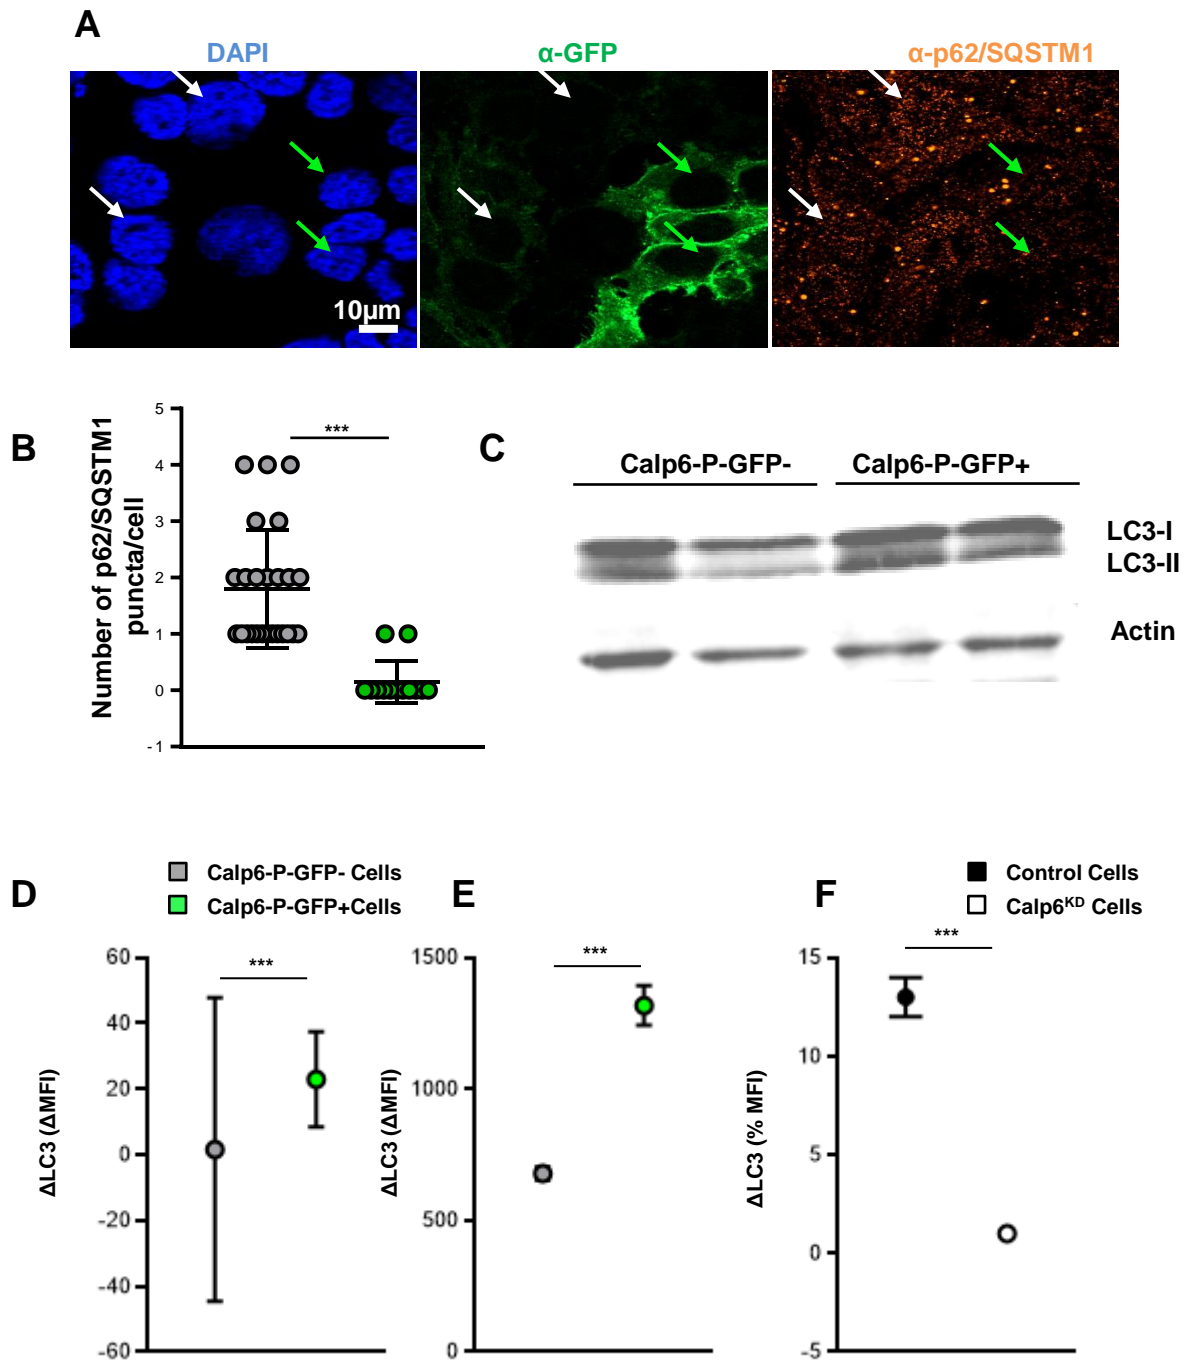

**Supplementary Fig. 9: High autophagy in calpain-6 expressing cells.** (A) Representative immunofluorescence of GFP and p62/SQSTM1 in Calp6-P-GFP 143B cells. White and green arrows indicate GFP- and GFP+ cells. (B) Quantification of p62/SQSTM1 puncta in 143B cells cultured in 3% O<sub>2</sub>. Data are mean ± SD in Calp6-P-GFP- and GFP+ cells by two-sided Student *t* test. (C) Western blot analysis of autophagosome-associated form of LC3, LC3-II, in 2 different protein extracts from sorted 143B Calp6-GFP- and GFP+ cells. (D) Flow cytometry quantification of ΔLC3 in mouse Calp6-P-GFP- and GFP+ K7M2 cells. n=89 000 GFP- cells n=3 300 GFP+ cells. (E) Flow cytometry quantification of ΔLC3 in human Ewing Calp6-P-GFP- and GFP+ TC71 cells. n=40 000 GFP- cells n=6 500 GFP+ cells. (F) Flow cytometry quantification of ΔLC3 in control and calpain-6<sup>KD</sup> TC71 cells. n=50 000 control or calpain-6 KD cells. Cells were cultured in 3% O<sub>2</sub>. Data are mean ± SD; \*\*\* indicate *p* values < 0.001 determined by two-tailed Student *t* test.

**Supplementary data. Table I : The list of primers**

|         |              |       | Forward                                              | Reverse                                                       |
|---------|--------------|-------|------------------------------------------------------|---------------------------------------------------------------|
| PCR     | RACE         | CAPN6 |                                                      | 5'-<br>CTTTCGGGTAGCCACGAGCCAGGT-3'                            |
|         | TSS Checking | F1    | 5'-CCTCATTCTAGGCATAGTTCAACAC-3'                      |                                                               |
|         |              | F2    | 5'-TGGGGTTACCTGGCTAACAG-3'                           | 5'-TGA CT TGT T GCC CAC C AT TA -3'                           |
| Cloning | Calp6-P      |       | 5'-CGGGGTACC ACT GTG ATG CA<br>GTATAGTATTTATAGGGA-3' | 5'-<br>TCCCCCGGGAGTGTGAACTATGCC<br>TAGAATGAGGCCTCATTCTAGGC-3' |
|         | mGFP         |       | 5'-AGCACAGTGGCGGCCG C AT TA<br>AGGGTCCGGATCATC-3'    | 5'-<br>TCTAGAGTCGCGGCCGCTTACTTGT<br>ACAGCTCGTCC-3'            |
| qPCR    | Calpain-6    | Human | 5'-ATGATCCCCTGATGAACCGC-3'                           | 5'-GTAAGTGC GCAGGTCCTTCT-3'                                   |
|         |              | Mouse | 5'-TGCTGTTTCCACCTGCCTAA-3'                           | 5'-TGGGATGTCAGGCTAGACCA-3'                                    |
|         | Oct4         | Human | 5'-AGCCTGGGGTACCAAATG-3'                             | 5'-AGCGATCAAGCAGCGACTAT-3'                                    |
|         | Sox2         | Human | 5'-TTGCTGCCTCTTTAAGACTAGGA-3'                        | 5'-CTGGGGCTCAA ACTTCTCTC-3'                                   |
|         | Nanog        | Human | 5'-TTCCTTCTCCATGGATCTG-3'                            | 5'-CTTTGGGACTGGTGG AAGAA-3'                                   |
|         | IL-1         | Human | 5'-TTCGAGGCACAAGGCACAA-3'                            | 5'-TGGCTGCTTCAGACACTTGAG-3'                                   |
|         | IL-8         | Human | 5'-GAGCCAGGAAGAAACCACCG-3'                           | 5'-TGGCAAAACTGCACCTTCACA-3'                                   |
|         | IL-6         | Human | 5'-GGCACTGGCAGAAAACAACC-3'                           | 5'-GCAAGTCTCCTCATTGAATCC-3'                                   |
|         | p16          | Mouse | 5'-CGGGGACATCAAGACATCGT-3'                           | 5'-TGAGGCCG GATTTAGCTCTG-3'                                   |
|         | p21          | Mouse | 5'-GACCAGCCTGACAGATTTCTATC-3'                        | 5'-TAAGGCCGAAGATGGGGAAG-3'                                    |
|         | Actin        | Human | 5'-GAGAAGAGCTACGAGCTGCCTG-3'                         | 5'-GGTAGTTTCGTGGATGCCACA-3'                                   |
|         | Actin        | Mouse | 5'-GGCTGTATTCCCCTCCATCG-3'                           | 5'-CCAGTTGGTAACAATGCCATGT-3'                                  |
|         | HPRT         | Mouse | 5'-TGAAGCGCTGCCAGTATGT-3'                            | 5'-GGTCGCTCAGAGCCTTGTA-3'                                     |
|         | PPi $\alpha$ | Human | 5'-GTCAACCCACCGTGTCTT-3'                             | 5'-CTGCTGTCTTTGGGACCTT-3'                                     |
|         | GAPDH        | Human | 5'-CGAGATCCCTCCAAAATCAA-3'                           | 5'-TGTGGTCATGAGTCC TTCCA-3'                                   |
| ChIP    | Cap6-P       | Human | 5'-AGAGCTTGGTACAGCCCAA-3'                            | 5'-TCCAGGGTAAGTTTGCGAAT-3'                                    |

**Supplementary data. Table II : The list of antibodies.** IF: Immunofluorescence; FC: Flow Cytometry; WB: Western Blot; IHC: Immunohistochemistry; ChIP: Chromatine ImmunoPrecipitation.

| Protein              | Host   | Supplier         | Dilution     |
|----------------------|--------|------------------|--------------|
| Luciferase           | Rabbit | Santa-Cruz       | 1:200 (IF)   |
| Ki67                 | Rat    | eBiosciences     | 1:200 (FC)   |
| Calpain-6            | Rabbit | Abxexa           | 1:10000 (WB) |
|                      | Goat   | Santa-Cruz       | 1:100 (IF)   |
| Pimonidazole Adducts | Mouse  | Hypoxyprome      | 1:100 (IF)   |
| HIF-1 $\alpha$       | Rabbit | Santa-Cruz       | 1:100 (IF)   |
| GFP                  | Goat   | Abcam            | 1:10000 (WB) |
|                      |        |                  | 1:500 (IHC)  |
| GATA4                | Mouse  | Santa-Cruz       | 1:500 (WB)   |
|                      |        |                  | 1:100 (IF)   |
| Actin                | Rabbit | Sigma-Aldrich    | 1:1000 (WB)  |
| $\alpha$ Tubulin     | Mouse  | Santa-Cruz       | 1:1000 (WB)  |
| GAPDH                | Mouse  | Santa-Cruz       | 1:1000 (WB)  |
| LC3                  | Rabbit | Sigma-Aldrich    | 1:1000 (WB)  |
|                      |        |                  | 1:200 (IF)   |
| LC3-Biotin           | Rabbit | Novus Biological | 1:200 (FC)   |
| Lamp2                | Rat    | Abcam            | 1:100 (IF)   |
| Oct4                 | Rabbit | Cell signaling   | 1:50 (ChIP)  |
| Sox2                 | Rabbit | Cell signaling   | 1:50 (ChIP)  |
| Nanog                | Rabbit | Cell signaling   | 1:50 (ChIP)  |
| p62                  | Rabbit | Santa-Cruz       | 1:100 (IF)   |
| Biotin               | Mouse  | Miltenyi         | 1:200 (FC)   |
